# Supplementary material
Source: PubMed Central journal article supplement (PMC6648746)
Supplement: ao8b02743_si_001.pdf [file ao8b02743_si_001.pdf]

**Polyethylene glycol (PEG<sub>400</sub>) modified layered double hydroxides: synthesis, characterization and study on adsorption characteristics for removal of acid orange II from aqueous solution**

Sujata Mandal<sup>\*,†</sup>, Sandhya Kalaivanan<sup>‡</sup>, Asit Baran Mandal<sup>§,#</sup>

<sup>†</sup> CLRI-Centre for Analysis, Testing, Evaluation & Reporting Services, CSIR-Central Leather Research Institute, Adyar, Chennai-600020, Tamilnadu, India

<sup>§</sup>CSIR-Central Leather Research Institute, Adyar, Chennai-600020, Tamilnadu, India.

<sup>#</sup>Present address: CSIR-Central Glass and Ceramic Research Institute, 196 Raja S. C. Mullick Road, Jadavpur, Kolkata 700032, India.

**Corresponding author's contact information**

\*SujataMandal: [sujata@clri.res.in](mailto:sujata@clri.res.in). Tel.: +91-44-24437167

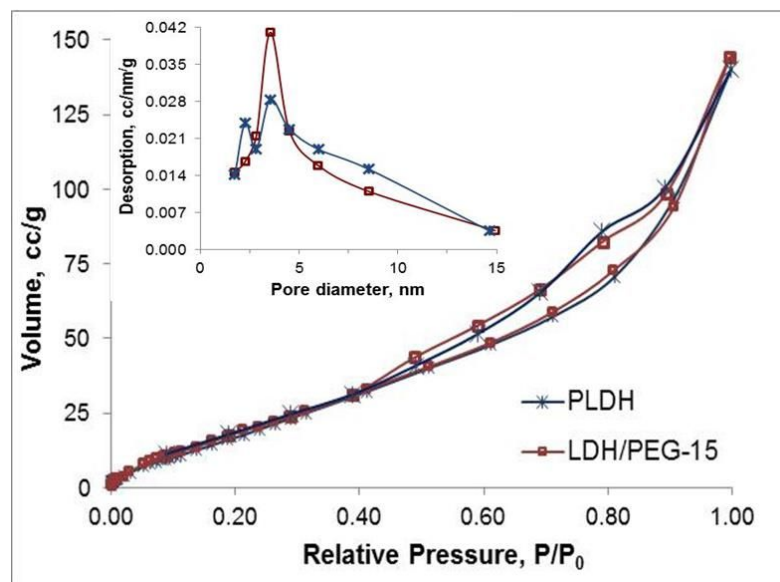

Figure S1. Nitrogen adsorption–desorption isotherms taken at 77 K and the BJH desorption plots of pore volume versus pore diameter for the PLDH and LDH/PEG-15.

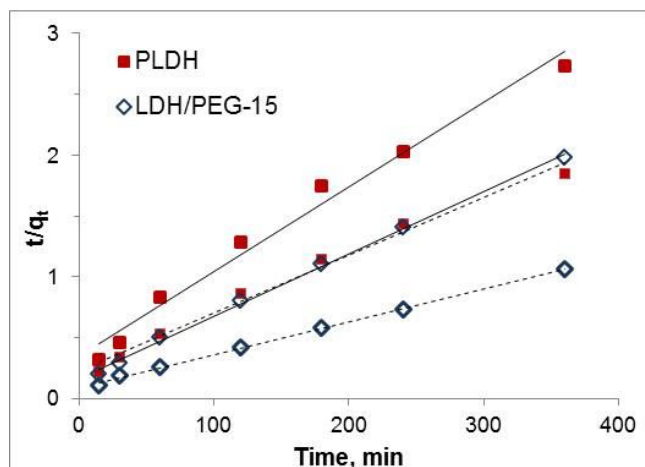

Figure S2. Pseudo second-order kinetic plots for the PLDH and the LDH/PEG-15 (solid lines for 100 mg/l and dotted lines for 200 mg/l of initial AO-II concentration).

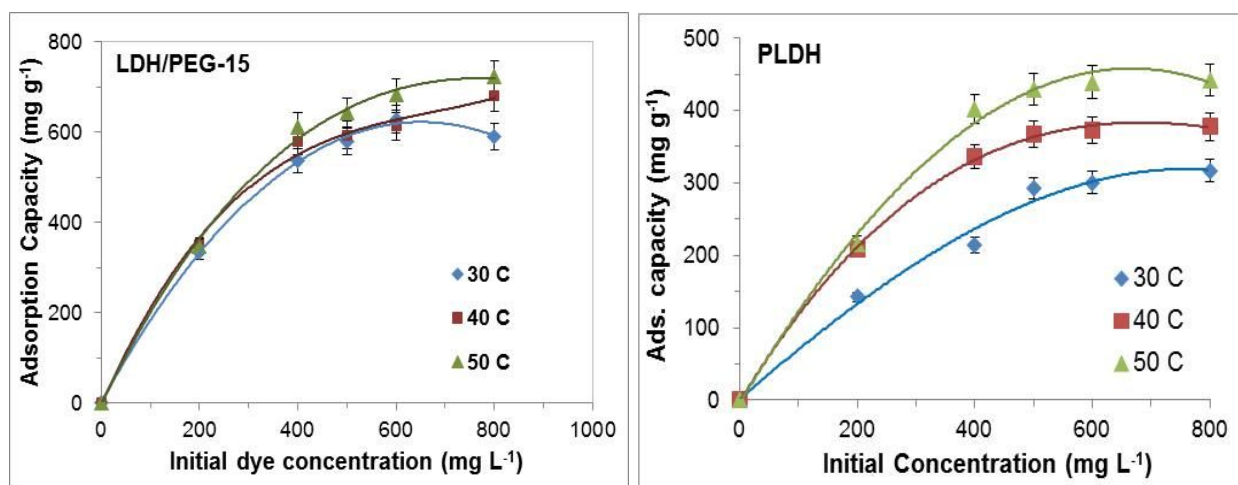

Figure S3. AO-II uptake per gram of the adsorbents as a function of initial AO-II concentration at different reaction temperatures (Initial AO-II concentration: 0 - 800 mg/l, adsorbent dose: 0.5 g/l, contact time: 2 h, error bar represents 5% error value).

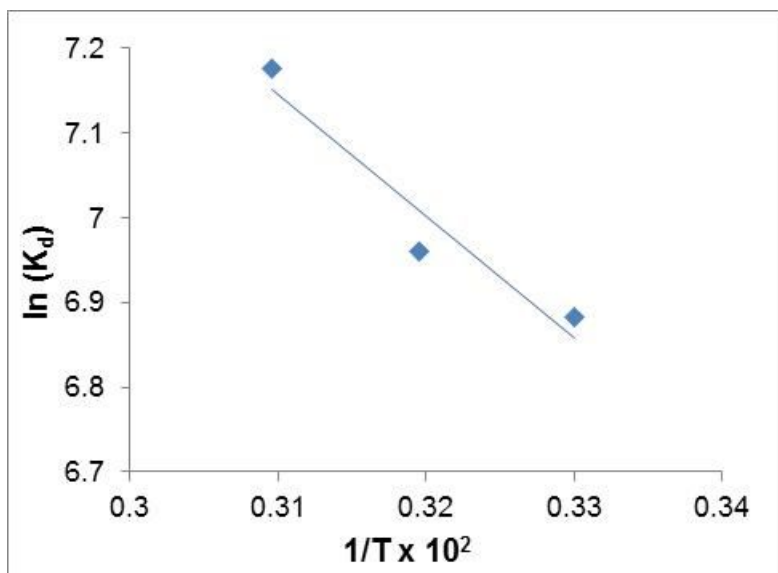

Figure S4. Van't Hoff plot showing relationship between  $1/T$  and  $\ln(K_d)$

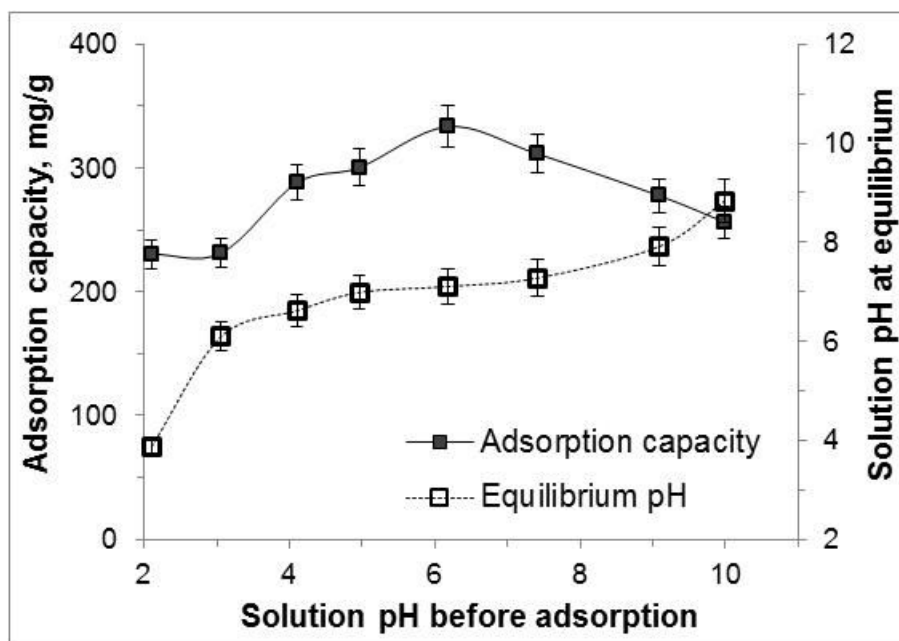

Figure S5. Influence of solution pH on the AO-II adsorption capacity of the PLDH and the LDH/PEG-15, and on the equilibrium pH of the solution (Initial AO-II concentration: 200 mg/l, contact time: 2 h, temp: 30 °C, adsorbent dose: 0.5 g/l).

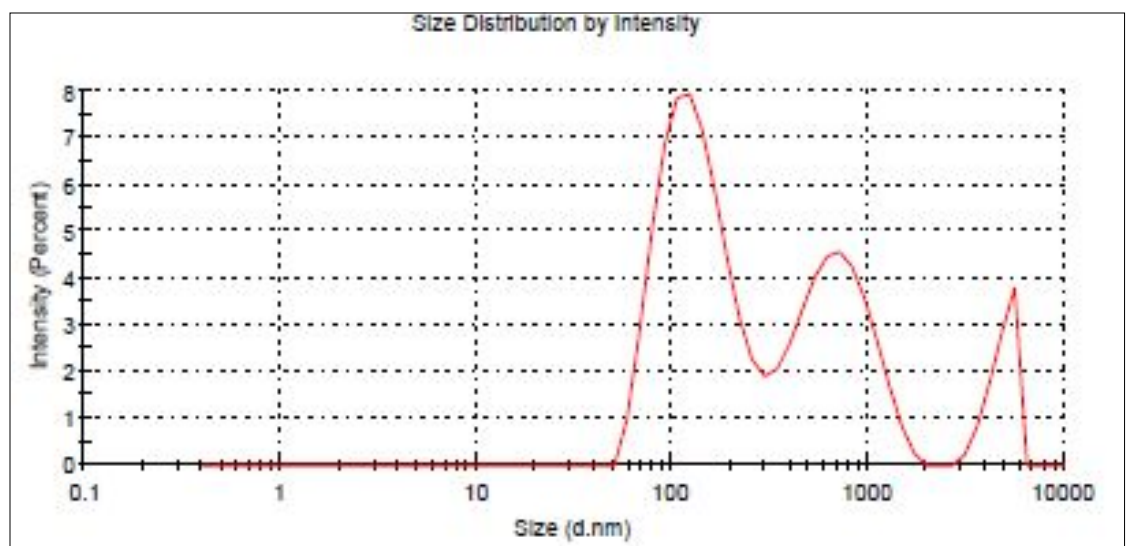

| Results           |       | Size (d.nm): | % Intensity: | St Dev (d.nm): |       |
|-------------------|-------|--------------|--------------|----------------|-------|
| Z-Average (d.nm): | 216.8 | Peak 1:      | 137.3        | 55.2           | 56.29 |
| Pdl:              | 0.634 | Peak 2:      | 708.0        | 35.4           | 298.5 |
| Intercept:        | 0.942 | Peak 3:      | 4831         | 9.3            | 715.0 |
| Result quality :  | Good  |              |              |                |       |

Figure S6. Particle size distribution of the Pristine LDH (PLDH).

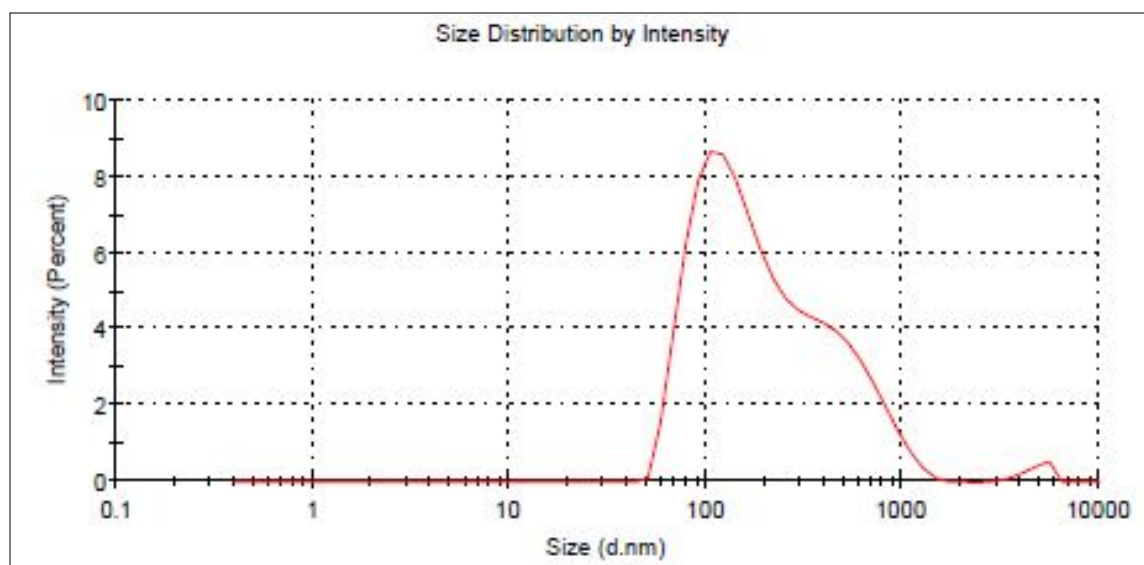

**Results**

|                                | Size (d.nm):         | % Intensity: | St Dev (d.nm): |
|--------------------------------|----------------------|--------------|----------------|
| <b>Z-Average (d.nm):</b> 160.8 | <b>Peak 1:</b> 259.2 | 98.6         | 224.0          |
| <b>Pdl:</b> 0.331              | <b>Peak 2:</b> 4815  | 1.4          | 719.5          |
| <b>Intercept:</b> 0.987        | <b>Peak 3:</b> 0.000 | 0.0          | 0.000          |
| <b>Result quality:</b> Good    |                      |              |                |

Figure S7. Particle size distribution of the LDH/PEG-15.

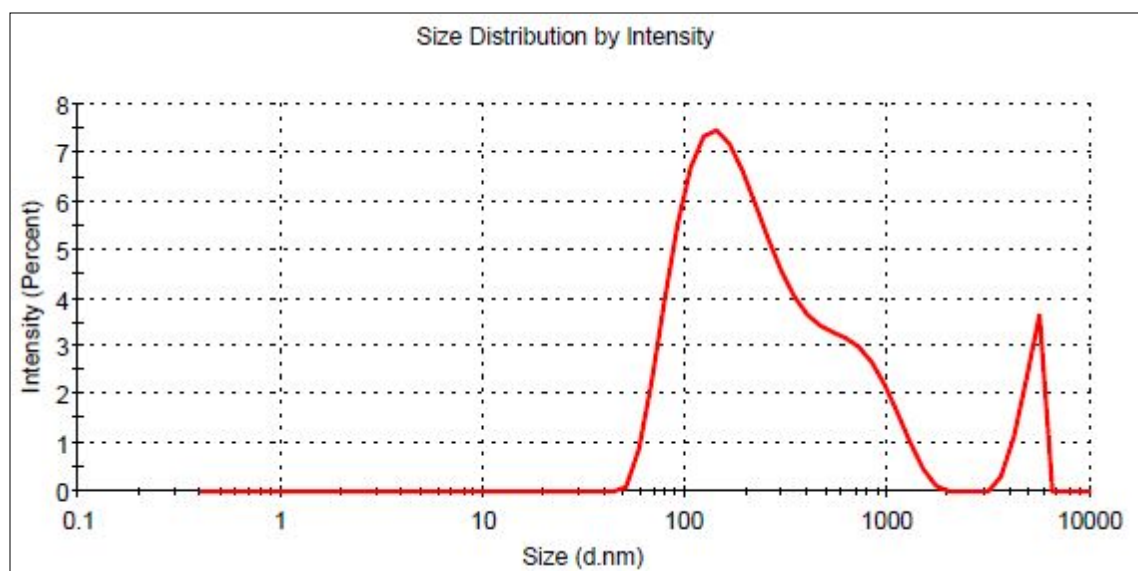

**Results**

|                                | Size (d.nm):         | % Intensity: | St Dev (d.nm): |
|--------------------------------|----------------------|--------------|----------------|
| <b>Z-Average (d.nm):</b> 218.8 | <b>Peak 1:</b> 205.9 | 73.8         | 108.5          |
| <b>Pdl:</b> 0.550              | <b>Peak 2:</b> 926.4 | 16.5         | 334.5          |
| <b>Intercept:</b> 0.961        | <b>Peak 3:</b> 4837  | 8.1          | 715.0          |

**Result quality :** Good

Figure S8. Particle size distribution of the LDH/PEG-50.

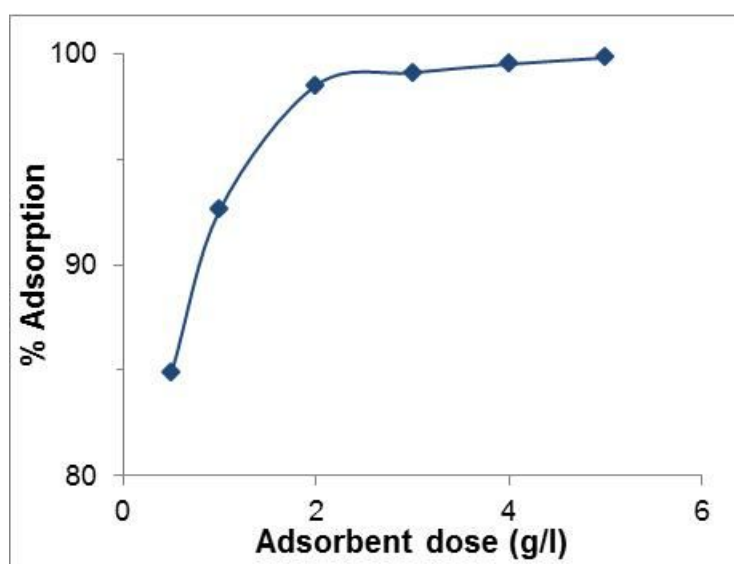

Figure S9. Influence of LDH/PEG-15 dose on the AO-II adsorption in aqueous solution.
